## COMMENTS AND RESPONSES

### **Monounsaturated Fat-Rich Diet Prevents Central Body Fat Distribution and Decreases Postprandial Adiponectin Expression Induced by a Carbohydrate- Rich Diet in Insulin- Resistant Subjects**

Response to Walker and O'Dea

**W**e thank Walker and O'Dea (1) for their interest in our study, wherein we have shown that when centrally overweight insulin-resistant subjects (offspring of obese and type 2 diabetic patients) are subjected to a short-term, weight-maintenance, carbohydrate-enriched diet, they redistribute their fat mass toward the abdominal fat depot (2). Walker and O'Dea (1) raised the concern that in our study, no significant differences in body weight and body fat distribution were observed when subjects were fed isocaloric diets enriched either with monounsaturated (MUFA) or high-saturated (SAT) diets. This contrasted with the observation by Walker and colleagues (3) that an isocaloric SAT-rich diet promotes more body weight gain than is predominantly deposited in the trunk than an isocaloric MUFA-rich diet.

In our opinion, this difference may be related to differences in the design of both

studies. For instance, two of the eight subjects included in the Walker and colleagues (3) study had a waist circumference  $<0.99$  cm. Also, the content of polyunsaturated fat (PUFA) present in the SAT (3%)– and MUFA (7%)–rich diets differed from our study. The changes in body weight observed by Walker et al. may also be related to the fact that the individuals following an SAT-rich diet had expended significantly more energy than those individuals following the MUFA-rich diet, probably due to differences in physical activity. In our opinion, factors such as the degree of central obesity, insulin-resistant state, level of physical activity, and PUFA content of diet could affect the body fat distribution response to the diet. Thus, we attempted to the best of our capabilities to control for these factors. Previous research by Walker et al. (4) observed this effect in type 2 diabetic patients. However, a similar effect was not observed by Clifton et al. (5) in nondiabetic patients subjected to a hypocaloric diet. Consequently, the initial phenotype of the patients and differences in the study design could be determinant to observe this phenomenon. The mechanisms explaining how specific macronutrient compositions may induce these topographic changes in fat deposition are unclear. Walker and colleagues (3) have hypothesized that MUFA and/or PUFA could be more effective at activating peroxisome proliferator-activated receptor (PPAR)- $\alpha$  and promoting fat oxidation. We have also shown that the rate of fat oxidation was higher with a MUFA-rich diet than that with SAT- and carbohydrate-rich diets. Finally, we speculate that preferential activation of PPAR- $\gamma$  signaling could also explain at least in part the differential result in carbohydrate metabolism observed when these subjects were fed an isocaloric MUFA-rich diet (2).

JUAN ANTONIO PANIAGUA, MD, PHD<sup>1</sup>  
ANTONIO VIDAL-PUIG, MD, PHD<sup>2</sup>

From the <sup>1</sup>Ciber Fisiopatología Obesidad y Nutrición (CB06/03), Instituto Salud Carlos III, Córdoba, Spain; and <sup>2</sup>Molecular Mechanisms of Energy Balance, University of Cambridge, Cambridge, U.K.

Address correspondence to Juan A. Paniagua Gonzalez, Unidad de Lípidos y Arteriosclerosis, Hospital Universitario Reina Sofía, Avda Menéndez Pidal, s/n. 14004, Córdoba, Spain. E-mail: japaniaguag@yahoo.es.

DOI: 10.2337/dc07-1475

© 2007 by the American Diabetes Association.

#### References

1. Walker KZ, O'Dea K: Monounsaturated fat-rich diet prevents central body fat distribution and decreases postprandial adiponectin expression induced by a carbohydrate-rich diet in insulin-resistant subjects (Letter). *Diabetes Care* 30:e123, 2007. DOI: 10.2337/dc07-1315
2. Paniagua JA, Gallego de la Sacristana A, Romero I, Vidal-Puig A, Latre JM, Sanchez E, Perez-Martinez P, Lopez-Miranda J, Perez-Jimenez F: Monounsaturated fat-rich diet prevents central body fat distribution and decreases postprandial adiponectin expression induced by a carbohydrate-rich diet in insulin-resistant subjects. *Diabetes Care* 30:1717–1723, 2007
3. Piers LS, Walker KZ, Stoney RM, Soares MJ, O'Dea K: Substitution of saturated with monounsaturated fat in a 4-week diet affects body weight and composition of overweight and obese men. *Br J Nutr* 90:717–727, 2003
4. Walker KZ, O'Dea K, Johnson L, Sinclair AJ, Piers LS, Nicholson GC, Muir JG: Body fat distribution and non-insulin-dependent diabetes: comparison of a fiber-rich, high-carbohydrate, low-fat (23%) diet and a 35% fat diet high in monounsaturated fat. *Am J Clin Nutr* 63:254–260, 1996
5. Clifton PM, Noakes M, Keogh JB: Very low-fat (12%) and high monounsaturated fat (35%) diets do not differentially affect abdominal fat loss in overweight, nondiabetic women. *J Nutr* 134:1741–1745, 2004
